# Supplementary material
Source: PubMed Central journal article supplement (PMC1955820)

124 Prokaryotic Genomes

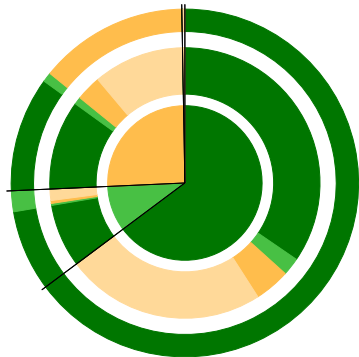

*Escherichia coli* K12

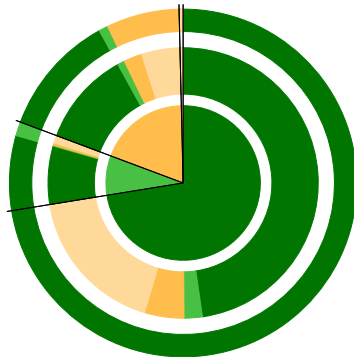

*Prochlorococcus marinus* SS120

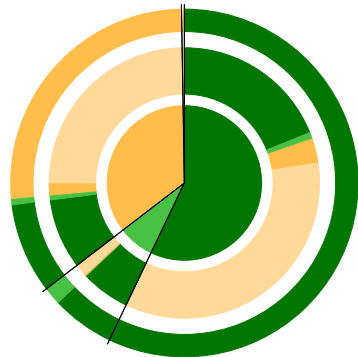

*Archaeoglobus fulgidus*

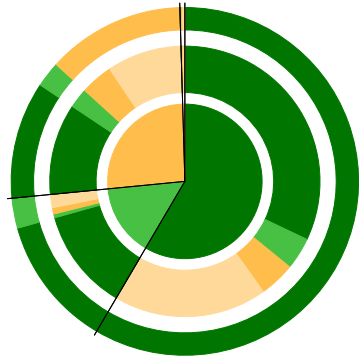

*Mycoplasma pneumoniae*

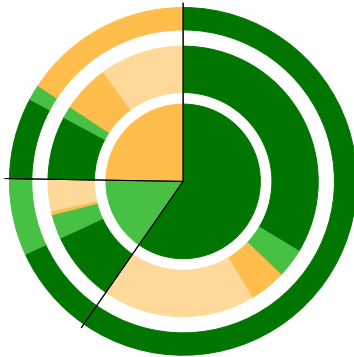

Supplement: pnas_0702636104_10.pdf [file pnas_0702636104_10.pdf]
