# Supplementary material
Source: PubMed Central journal article supplement (PMC1955820)
Supplement: pnas_0702636104_11.pdf [file pnas_0702636104_11.pdf]

Table 1. Range of function prediction protocols in a sampling of metagenomics publications to date

| Pub. Yr.     | Environment (Location)                        | No. of ORFs (Mbp) | No. of novel ORFs (%) | No. of COGs*  | Gene calling                                         |                               |                                |                                                | Functional annotation        |                                                                  |                                             | Org.         | Ref.                                     |
|--------------|-----------------------------------------------|-------------------|-----------------------|---------------|------------------------------------------------------|-------------------------------|--------------------------------|------------------------------------------------|------------------------------|------------------------------------------------------------------|---------------------------------------------|--------------|------------------------------------------|
|              |                                               |                   |                       |               | Procedure                                            | Sequence comparison algorithm | Parameters and cutoffs         | Sequence DB searched                           | Procedure                    | Parameters                                                       | Functional DB searched                      |              |                                          |
| 2004         | Acid Mine (California)                        | 46,862 (76)       | 34,301 73.20          | 1,824         | FGENESB pipeline (Softberry Inc)                     | DBScan                        | 1E-10, >100 bp                 | nr                                             | blastp against COG           | manual refinement using ARTEMIS tool                             | COG, nr                                     | UCB          | Tyson et al. 2004. Nature 428:37–43.     |
| 2004         | Surface Sea Water (Sargasso Sea, samples 1-4) | 1,001,987 (779)   | 649,608 64.83         | 3,714         | Evidence-based, using translation start & stop sites | tblastn<br>tblastx            | 1E-03<br>1E-04                 | Genes: Bacterial portion of nraa<br>rRNA: nraa | BLAST against TIGR<br>blastn | >40bp, 5 or more hits to a role<br>1E-40                         | TIGR Role Category<br>Sargasso (self-blast) | Venter Inst. | Venter et al. 2004. Science 304:66–74.   |
| 2005         | Deep-Sea Whalefall (Pacific, Antarctic)       | 122,147 (75)      | 63,021 51.59          | 3,332         | FGENESB pipeline (Softberry Inc)                     | DBScan                        | Default parameters of software | nraa                                           | blastp against COG, KEGG     | low-complexity filtering disabled, 60 bits cutoff equiv. to 15-9 | extCOG** v 6, KEGG                          | JGI          | Tringe et al. 2005. Science 308:554–557. |
| 2005         | Farm Soil (Minnesota)                         | 183,536 (100)     | 114,301 62.28         | 3,394         | FGENESB pipeline (Softberry Inc)                     | DBScan                        | Default parameters of software | nraa                                           | blastp against COG, KEGG     | low-complexity filtering disabled, 60 bits cutoff equiv. to 15-9 | extCOG** v 6, KEGG                          | JGI          | Tringe et al. 2005. Science 308:554–557. |
| <b>Total</b> |                                               | 1,354,532         | 1,030                 | 861,231 63.58 |                                                      |                               |                                |                                                |                              |                                                                  |                                             |              |                                          |

\* ACE/Chao1 estimates of community richness.

\*\* extCOG, extended COG database in STRING.
