# Supplementary material
Source: PubMed Central journal article supplement (PMC1955820)
Supplement: pnas_0702636104_12.pdf [file pnas_0702636104_12.pdf]

Table 2. Metagenomic data in Fig. 2 and SI Fig 6

|                                 | Total ORFs | Similarity |       | Neighborhood |       | Combined |       | Overall   |       |
|---------------------------------|------------|------------|-------|--------------|-------|----------|-------|-----------|-------|
| Environments Combined (60 bits) | 1,438,944  | 938,342    | 65.2% | 248,943      | 17.3% | 938,342  | 65.2% | 1,097,085 | 76.2% |
|                                 |            |            |       | 23,274       | 1.6%  | 0        | 0.0%  |           |       |
|                                 |            |            |       | 14,502       | 1.0%  | 0        | 0.0%  |           |       |
|                                 |            |            |       | 651,623      | 45.3% | 0        | 0.0%  |           |       |
|                                 |            | 187,249    | 13.0% | 88,964       | 6.2%  | 88,964   | 6.2%  | 103,954   | 7.2%  |
|                                 |            |            |       | 3,095        | 0.2%  | 98,285   | 6.8%  |           |       |
|                                 |            |            |       | 1,757        | 0.1%  | 0        | 0.0%  |           |       |
|                                 |            |            |       | 93,433       | 6.5%  | 0        | 0.0%  |           |       |
|                                 |            | 133,459    | 9.3%  | 57,394       | 4.0%  | 57,394   | 4.0%  | 76,801    | 5.3%  |
|                                 |            |            |       | 1,824        | 0.1%  | 1,824    | 0.1%  |           |       |
|                                 |            |            |       | 2,925        | 0.2%  | 74,241   | 5.2%  |           |       |
|                                 |            |            |       | 71,316       | 5.0%  | 0        | 0.0%  |           |       |
|                                 |            | 179,894    | 12.5% | 12,385       | 0.9%  | 12,385   | 0.9%  | 161,104   | 11.2% |
|                                 |            |            |       | 3,845        | 0.3%  | 3,845    | 0.3%  |           |       |
| 2,560                           | 0.2%       |            |       | 2,560        | 0.2%  |          |       |           |       |
| 161,104                         | 11.2%      |            |       | 161,104      | 11.2% |          |       |           |       |
| Whale Fall (60 bits)            | 122,146    | 66,055     | 54.1% | 13,637       | 11.2% | 66,055   | 54.1% | 80,557    | 66.0% |
|                                 |            |            |       | 2,069        | 1.7%  | 0        | 0.0%  |           |       |
|                                 |            |            |       | 1,357        | 1.1%  | 0        | 0.0%  |           |       |
|                                 |            |            |       | 48,992       | 40.1% | 0        | 0.0%  |           |       |
|                                 |            | 16,714     | 13.7% | 7,436        | 6.1%  | 7,436    | 6.1%  | 10,395    | 8.5%  |
|                                 |            |            |       | 469          | 0.4%  | 9,278    | 7.6%  |           |       |
|                                 |            |            |       | 265          | 0.2%  | 0        | 0.0%  |           |       |
|                                 |            |            |       | 8,544        | 7.0%  | 0        | 0.0%  |           |       |
|                                 |            | 12,765     | 10.5% | 5,032        | 4.1%  | 5,032    | 4.1%  | 8,049     | 6.6%  |
|                                 |            |            |       | 290          | 0.2%  | 290      | 0.2%  |           |       |
|                                 |            |            |       | 468          | 0.4%  | 7,443    | 6.1%  |           |       |
|                                 |            |            |       | 6,975        | 5.7%  | 0        | 0.0%  |           |       |
|                                 |            | 26,612     | 21.8% | 2,034        | 1.7%  | 2,034    | 1.7%  | 23,145    | 19.0% |
|                                 |            |            |       | 827          | 0.7%  | 827      | 0.7%  |           |       |
| 606                             | 0.5%       |            |       | 606          | 0.5%  |          |       |           |       |
| 23,145                          | 19.0%      |            |       | 23,145       | 19.0% |          |       |           |       |
| Surface Sea Water (60 bits)     | 1,086,400  | 772,660    | 71.1% | 218,182      | 20.1% | 772,660  | 71.1% | 893,306   | 82.2% |
|                                 |            |            |       | 18,373       | 1.7%  | 0        | 0.0%  |           |       |
|                                 |            |            |       | 11,531       | 1.1%  | 0        | 0.0%  |           |       |
|                                 |            |            |       | 524,574      | 48.3% | 0        | 0.0%  |           |       |
|                                 |            | 135,913    | 12.5% | 69,587       | 6.4%  | 69,587   | 6.4%  | 68,475    | 6.3%  |
|                                 |            |            |       | 1,770        | 0.2%  | 66,326   | 6.1%  |           |       |
|                                 |            |            |       | 1,065        | 0.1%  | 0        | 0.0%  |           |       |
|                                 |            |            |       | 63,491       | 5.8%  | 0        | 0.0%  |           |       |
|                                 |            | 100,673    | 9.3%  | 44,456       | 4.1%  | 44,456   | 4.1%  | 56,076    | 5.2%  |
|                                 |            |            |       | 1,126        | 0.1%  | 1,126    | 0.1%  |           |       |
|                                 |            |            |       | 1,906        | 0.2%  | 55,091   | 5.1%  |           |       |
|                                 |            |            |       | 53,185       | 4.9%  | 0        | 0.0%  |           |       |
|                                 |            | 77,154     | 7.1%  | 6,603        | 0.6%  | 6,603    | 0.6%  | 68,543    | 6.3%  |
|                                 |            |            |       | 1,023        | 0.1%  | 1,023    | 0.1%  |           |       |
| 985                             | 0.1%       |            |       | 985          | 0.1%  |          |       |           |       |
| 68,543                          | 6.3%       |            |       | 68,543       | 6.3%  |          |       |           |       |
| Acid Mine (60 bits)             | 46,862     | 20,643     | 44.1% | 5,297        | 11.3% | 20,643   | 44.1% | 25,295    | 54.0% |
|                                 |            |            |       | 658          | 1.4%  | 0        | 0.0%  |           |       |
|                                 |            |            |       | 626          | 1.3%  | 0        | 0.0%  |           |       |
|                                 |            |            |       | 14,062       | 30.0% | 0        | 0.0%  |           |       |
|                                 |            | 5,523      | 11.8% | 2,268        | 4.8%  | 2,268    | 4.8%  | 3,803     | 8.1%  |
|                                 |            |            |       | 186          | 0.4%  | 3,255    | 7.0%  |           |       |
|                                 |            |            |       | 113          | 0.2%  | 0        | 0.0%  |           |       |
|                                 |            |            |       | 2,956        | 6.3%  | 0        | 0.0%  |           |       |
|                                 |            | 4,360      | 9.3%  | 1,527        | 3.3%  | 1,527    | 3.3%  | 2,940     | 6.3%  |
|                                 |            |            |       | 141          | 0.3%  | 141      | 0.3%  |           |       |
|                                 |            |            |       | 221          | 0.5%  | 2,692    | 5.7%  |           |       |
|                                 |            |            |       | 2,471        | 5.3%  | 0        | 0.0%  |           |       |
|                                 |            | 16,336     | 34.9% | 857          | 1.8%  | 857      | 1.8%  | 14,824    | 31.6% |
|                                 |            |            |       | 407          | 0.9%  | 407      | 0.9%  |           |       |
| 248                             | 0.5%       |            |       | 248          | 0.5%  |          |       |           |       |
| 14,824                          | 31.6%      |            |       | 14,824       | 31.6% |          |       |           |       |
| Minnesota Soil (60 bits)        | 183,536    | 78,984     | 43.0% | 11,827       | 6.4%  | 78,984   | 43.0% | 97,927    | 53.4% |
|                                 |            |            |       | 2,174        | 1.2%  | 0        | 0.0%  |           |       |
|                                 |            |            |       | 988          | 0.5%  | 0        | 0.0%  |           |       |
|                                 |            |            |       | 63,995       | 34.9% | 0        | 0.0%  |           |       |
|                                 |            | 29,099     | 15.9% | 9,673        | 5.3%  | 9,673    | 5.3%  | 21,281    | 11.6% |
|                                 |            |            |       | 670          | 0.4%  | 19,426   | 10.6% |           |       |
|                                 |            |            |       | 314          | 0.2%  | 0        | 0.0%  |           |       |
|                                 |            |            |       | 18,442       | 10.1% | 0        | 0.0%  |           |       |
|                                 |            | 15,661     | 8.5%  | 6,379        | 3.5%  | 6,379    | 3.5%  | 9,736     | 5.3%  |
|                                 |            |            |       | 267          | 0.2%  | 267      | 0.2%  |           |       |
|                                 |            |            |       | 330          | 0.2%  | 9,015    | 4.9%  |           |       |
|                                 |            |            |       | 8,685        | 4.7%  | 0        | 0.0%  |           |       |
|                                 |            | 59,792     | 32.6% | 2,891        | 1.6%  | 2,891    | 1.6%  | 54,592    | 29.7% |
|                                 |            |            |       | 1,588        | 0.9%  | 1,588    | 0.9%  |           |       |
| 721                             | 0.4%       |            |       | 721          | 0.4%  |          |       |           |       |
| 54,592                          | 29.7%      |            |       | 54,592       | 29.7% |          |       |           |       |

Moving from top to bottom is equivalent to moving clockwise around the pie chart and moving from left to right across the table is equivalent to moving from the inner pie to the outside ring of the 60 bit column of SI Fig. 6. A description of the colors used and the corresponding categories can be found in Fig. 2.
