# Supplementary material
Source: PubMed Central journal article supplement (PMC1955820)
Supplement: pnas_0702636104_13.pdf [file pnas_0702636104_13.pdf]

Table 3. Data for 124 prokaryotic genomes in Fig. 2 and for the four species in Fig. 7.

|                               | Total ORFs | Similarity |        | Neighborhood |        | Combined |        | Overall |       |
|-------------------------------|------------|------------|--------|--------------|--------|----------|--------|---------|-------|
| 124 Prokaryotic Genomes       | 344,619    | 223,296    | 64.8%  | 119,078      | 34.6%  | 223,296  | 64.8%  | 286,225 | 83.1% |
|                               |            |            |        | 7,337        | 2.1%   | 0        | 0.0%   |         |       |
|                               |            |            |        | 14,594       | 4.2%   | 0        | 0.0%   |         |       |
|                               |            |            |        | 82,287       | 23.9%  | 0        | 0.0%   |         |       |
|                               | 32,703     | 9.5%       | 26,016 | 7.6%         | 26,016 | 7.6%     | 9,773  | 2.8%    |       |
|                               |            |            | 810    | 0.2%         | 6,687  | 1.9%     |        |         |       |
|                               |            |            | 1,197  | 0.4%         | 0      | 0.0%     |        |         |       |
|                               |            |            | 4,680  | 1.4%         | 0      | 0.0%     |        |         |       |
|                               | 87,653     | 25.4%      | 36,779 | 10.7%        | 36,779 | 10.7%    | 47,919 | 13.9%   |       |
|                               |            |            | 3,057  | 0.9%         | 3,057  | 0.9%     |        |         |       |
|                               |            |            | 10,382 | 3.0%         | 47,817 | 13.9%    |        |         |       |
|                               |            |            | 37,435 | 10.9%        | 0      | 0.0%     |        |         |       |
|                               | 967        | 0.3%       | 134    | 0.0%         | 134    | 0.0%     | 702    | 0.2%    |       |
| 29                            |            |            | 0.0%   | 29           | 0.0%   |          |        |         |       |
| 102                           |            |            | 0.0%   | 102          | 0.0%   |          |        |         |       |
| 702                           |            |            | 0.2%   | 702          | 0.2%   |          |        |         |       |
| Mycoplasma pneumoniae         | 687        | 410        | 59.7%  | 231          | 33.6%  | 410      | 59.7%  | 520     | 75.7% |
|                               |            |            |        | 24           | 3.5%   | 0        | 0.0%   |         |       |
|                               |            |            |        | 30           | 4.4%   | 0        | 0.0%   |         |       |
|                               |            |            |        | 125          | 18.2%  | 0        | 0.0%   |         |       |
|                               | 107        | 15.6%      | 58     | 8.4%         | 58     | 8.4%     | 59     | 8.6%    |       |
|                               |            |            | 20     | 2.9%         | 49     | 7.1%     |        |         |       |
|                               |            |            | 3      | 0.4%         | 0      | 0.0%     |        |         |       |
|                               |            |            | 26     | 3.8%         | 0      | 0.0%     |        |         |       |
|                               | 170        | 24.8%      | 52     | 7.6%         | 52     | 7.6%     | 108    | 15.7%   |       |
|                               |            |            | 10     | 1.5%         | 10     | 1.5%     |        |         |       |
|                               |            |            | 39     | 5.7%         | 108    | 15.7%    |        |         |       |
|                               |            |            | 69     | 10.0%        | 0      | 0.0%     |        |         |       |
|                               | 0          | 0.0%       | 0      | 0.0%         | 0      | 0.0%     | 0      | 0.0%    |       |
| 0                             |            |            | 0.0%   | 0            | 0.0%   |          |        |         |       |
| 0                             |            |            | 0.0%   | 0            | 0.0%   |          |        |         |       |
| 0                             |            |            | 0.0%   | 0            | 0.0%   |          |        |         |       |
| Escherichia coli K12          | 4,305      | 3,119      | 72.5%  | 2,054        | 47.7%  | 3,119    | 72.5%  | 3,907   | 90.8% |
|                               |            |            |        | 94           | 2.2%   | 0        | 0.0%   |         |       |
|                               |            |            |        | 203          | 4.7%   | 0        | 0.0%   |         |       |
|                               |            |            |        | 768          | 17.8%  | 0        | 0.0%   |         |       |
|                               | 355        | 8.3%       | 299    | 7.0%         | 299    | 7.0%     | 94     | 2.2%    |       |
|                               |            |            | 5      | 0.1%         | 56     | 1.3%     |        |         |       |
|                               |            |            | 12     | 0.3%         | 0      | 0.0%     |        |         |       |
|                               |            |            | 39     | 0.9%         | 0      | 0.0%     |        |         |       |
|                               | 815        | 18.9%      | 486    | 11.3%        | 486    | 11.3%    | 293    | 6.8%    |       |
|                               |            |            | 37     | 0.9%         | 37     | 0.9%     |        |         |       |
|                               |            |            | 94     | 2.2%         | 292    | 6.8%     |        |         |       |
|                               |            |            | 198    | 4.6%         | 0      | 0.0%     |        |         |       |
|                               | 16         | 0.4%       | 3      | 0.1%         | 3      | 0.1%     | 11     | 0.3%    |       |
| 1                             |            |            | 0.0%   | 1            | 0.0%   |          |        |         |       |
| 1                             |            |            | 0.0%   | 1            | 0.0%   |          |        |         |       |
| 11                            |            |            | 0.3%   | 11           | 0.3%   |          |        |         |       |
| Archaeoglobus fulgidus        | 2,396      | 1,401      | 58.5%  | 768          | 32.1%  | 1,401    | 58.5%  | 1,957   | 81.7% |
|                               |            |            |        | 92           | 3.8%   | 0        | 0.0%   |         |       |
|                               |            |            |        | 102          | 4.3%   | 0        | 0.0%   |         |       |
|                               |            |            |        | 439          | 18.3%  | 0        | 0.0%   |         |       |
|                               | 359        | 15.0%      | 292    | 12.2%        | 292    | 12.2%    | 124    | 5.2%    |       |
|                               |            |            | 11     | 0.5%         | 67     | 2.8%     |        |         |       |
|                               |            |            | 18     | 0.8%         | 0      | 0.0%     |        |         |       |
|                               |            |            | 38     | 1.6%         | 0      | 0.0%     |        |         |       |
|                               | 625        | 26.1%      | 261    | 10.9%        | 261    | 10.9%    | 310    | 12.9%   |       |
|                               |            |            | 57     | 2.4%         | 57     | 2.4%     |        |         |       |
|                               |            |            | 93     | 3.9%         | 307    | 12.8%    |        |         |       |
|                               |            |            | 214    | 8.9%         | 0      | 0.0%     |        |         |       |
|                               | 11         | 0.5%       | 3      | 0.1%         | 3      | 0.1%     | 5      | 0.2%    |       |
| 0                             |            |            | 0.0%   | 0            | 0.0%   |          |        |         |       |
| 3                             |            |            | 0.1%   | 3            | 0.1%   |          |        |         |       |
| 5                             |            |            | 0.2%   | 5            | 0.2%   |          |        |         |       |
| Prochlorococcus marinus SS120 | 1,881      | 1,074      | 57.1%  | 356          | 18.9%  | 1,074    | 57.1%  | 1,342   | 71.4% |
|                               |            |            |        | 15           | 0.8%   | 0        | 0.0%   |         |       |
|                               |            |            |        | 55           | 2.9%   | 0        | 0.0%   |         |       |
|                               |            |            |        | 648          | 34.5%  | 0        | 0.0%   |         |       |
|                               | 141        | 7.5%       | 110    | 5.9%         | 110    | 5.9%     | 42     | 2.2%    |       |
|                               |            |            | 2      | 0.1%         | 31     | 1.7%     |        |         |       |
|                               |            |            | 2      | 0.1%         | 0      | 0.0%     |        |         |       |
|                               |            |            | 27     | 1.4%         | 0      | 0.0%     |        |         |       |
|                               | 661        | 35.1%      | 158    | 8.4%         | 158    | 8.4%     | 492    | 26.2%   |       |
|                               |            |            | 11     | 0.6%         | 11     | 0.6%     |        |         |       |
|                               |            |            | 27     | 1.4%         | 492    | 26.2%    |        |         |       |
|                               |            |            | 465    | 24.7%        | 0      | 0.0%     |        |         |       |
|                               | 5          | 0.3%       | 0      | 0.0%         | 0      | 0.0%     | 5      | 0.3%    |       |
| 0                             |            |            | 0.0%   | 0            | 0.0%   |          |        |         |       |
| 0                             |            |            | 0.0%   | 0            | 0.0%   |          |        |         |       |
| 5                             |            |            | 0.3%   | 5            | 0.3%   |          |        |         |       |

Moving from top to bottom is equivalent to moving clockwise around the pie chart and moving from left to right across the table is equivalent to moving from the inner pie to the outside ring SI Fig. 7. A description of the colors used and the corresponding categories can be found in Fig. 2.
