# Supplementary material
Source: PubMed Central journal article supplement (PMC1955820)
Supplement: pnas_0702636104_14.pdf [file pnas_0702636104_14.pdf]

Table 4. Neighborhood information for each of the data sets analysed

| Dataset                 | Total Genes | Genes in at least 1 Neighborhood |                  | ->->    |                  | -><-    |                  | <-->    |                  |
|-------------------------|-------------|----------------------------------|------------------|---------|------------------|---------|------------------|---------|------------------|
|                         |             | Genes                            | Percent of total | Genes   | Percent of total | Genes   | Percent of total | Genes   | Percent of total |
| Whale Fall              | 122,147     | 76,456                           | 62.59            | 56,038  | 45.88            | 13,860  | 11.35            | 10,336  | 8.46             |
| Sea Water               | 1,086,400   | 681,651                          | 62.74            | 519,688 | 47.84            | 111,774 | 10.29            | 101,656 | 9.36             |
| Acid Mine               | 46,862      | 30,349                           | 64.76            | 21,434  | 45.74            | 7,552   | 16.12            | 7,994   | 17.06            |
| Minnesota Soil          | 183,536     | 111,154                          | 60.56            | 76,474  | 41.67            | 21,274  | 11.59            | 17,892  | 9.75             |
| Environments Combined   | 1,438,945   | 899,610                          | 62.52            | 673,634 | 46.81            | 154,460 | 10.73            | 137,878 | 9.58             |
| 124 Prokaryotic Genomes | 344,619     | 343,584                          | 99.70            | 303,968 | 88.20            | 102,668 | 29.79            | 102,597 | 29.77            |
