# Supplementary material
Source: PubMed Central journal article supplement (PMC1955820)
Supplement: pnas_0702636104_15.pdf [file pnas_0702636104_15.pdf]

Table 5. KEGG maps overrepresented in environmental data sets relative to fully sequenced genomes

| KEGG id | Description                                          | Freq Meta | Freq String | p-value   |
|---------|------------------------------------------------------|-----------|-------------|-----------|
| 2030    | Bacterial chemotaxis                                 | 3.955E-03 | 1.028E-02   | 0.000E+00 |
| 2040    | Flagellar assembly                                   | 7.637E-03 | 2.568E-02   | 0.000E+00 |
| 3010    | Ribosome                                             | 5.441E-02 | 9.569E-02   | 0.000E+00 |
| 3070    | Type III secretion system                            | 2.154E-03 | 1.157E-02   | 0.000E+00 |
| 3080    | Type IV secretion system                             | 7.391E-04 | 3.904E-03   | 0.000E+00 |
| 3090    | Type II secretion system                             | 7.138E-03 | 1.750E-02   | 0.000E+00 |
| 860     | Porphylin and chlorophyll metabolism                 | 1.907E-02 | 2.967E-02   | 8.228E-74 |
| 290     | Valine, leucine and isoleucine biosynthesis          | 3.706E-02 | 2.348E-02   | 1.494E-71 |
| 260     | Glycine, serine and threonine metabolism             | 5.683E-02 | 4.052E-02   | 6.741E-68 |
| 640     | Propanoate metabolism                                | 4.272E-02 | 2.914E-02   | 5.446E-62 |
| 380     | Tryptophan metabolism                                | 3.258E-02 | 2.088E-02   | 4.470E-60 |
| 780     | Biotin metabolism                                    | 4.589E-03 | 9.323E-03   | 7.939E-57 |
| 512     | O-Glycan biosynthesis                                | 4.855E-03 | 1.044E-03   | 4.546E-44 |
| 533     | Keratan sulfate biosyntheses                         | 4.844E-03 | 1.044E-03   | 6.537E-44 |
| 602     | Glycosphingolipid biosynthesis - neo-lactoseries     | 6.187E-03 | 2.059E-03   | 6.292E-40 |
| 604     | Glycosphingolipid biosynthesis - ganglioseries       | 6.140E-03 | 2.030E-03   | 7.152E-40 |
| 30      | Pentose phosphate pathway                            | 2.067E-02 | 2.823E-02   | 2.144E-35 |
| 903     | Limonene and pinene degradation                      | 2.380E-02 | 1.609E-02   | 3.357E-35 |
| 71      | Fatty acid metabolism                                | 2.882E-02 | 2.035E-02   | 4.739E-35 |
| 195     | Photosynthesis                                       | 1.384E-03 | 3.432E-03   | 3.694E-33 |
| 251     | Glutamate metabolism                                 | 4.090E-02 | 3.114E-02   | 5.939E-33 |
| 790     | Folate biosynthesis                                  | 1.190E-02 | 1.744E-02   | 2.363E-32 |
| 510     | N-Glycan biosynthesis                                | 8.634E-03 | 4.218E-03   | 4.657E-32 |
| 53      | Ascorbate and aldarate metabolism                    | 1.294E-02 | 7.650E-03   | 2.048E-30 |
| 120     | Bile acid biosynthesis                               | 2.078E-02 | 1.407E-02   | 2.313E-30 |
| 1052    | Type I polyketide structures                         | 2.010E-03 | 0.000E+00   | 2.551E-30 |
| 280     | Valine, leucine and isoleucine degradation           | 3.329E-02 | 2.482E-02   | 2.649E-30 |
| 600     | Sphingolipid metabolism                              | 1.467E-02 | 9.065E-03   | 4.607E-30 |
| 4010    | MAPK signaling pathway                               | 1.862E-03 | 0.000E+00   | 4.811E-28 |
| 730     | Thiamine metabolism                                  | 3.349E-03 | 6.134E-03   | 2.087E-27 |
| 310     | Lysine degradation                                   | 3.426E-02 | 2.611E-02   | 3.464E-27 |
| 410     | beta-Alanine metabolism                              | 1.918E-02 | 1.318E-02   | 3.607E-26 |
| 500     | Starch and sucrose metabolism                        | 2.340E-02 | 3.016E-02   | 3.073E-25 |
| 603     | Glycosphingolipid biosynthesis - globoseries         | 7.753E-03 | 4.032E-03   | 3.808E-25 |
| 3020    | RNA polymerase                                       | 1.353E-02 | 8.679E-03   | 3.103E-24 |
| 40      | Pentose and glucuronate interconversions             | 9.135E-03 | 1.323E-02   | 7.504E-23 |
| 20      | Citrate cycle (TCA cycle)                            | 3.275E-02 | 2.549E-02   | 2.027E-22 |
| 1051    | Biosynthesis of ansamycins                           | 1.489E-03 | 0.000E+00   | 2.562E-22 |
| 193     | ATP synthesis                                        | 1.120E-02 | 1.554E-02   | 3.857E-21 |
| 3060    | Protein export                                       | 1.851E-02 | 2.392E-02   | 2.633E-20 |
| 641     | 3-Chloroacrylic acid degradation                     | 1.526E-03 | 1.001E-04   | 9.910E-20 |
| 51      | Fructose and mannose metabolism                      | 2.660E-02 | 3.280E-02   | 7.591E-19 |
| 970     | Aminoacyl-tRNA biosynthesis                          | 4.741E-02 | 3.949E-02   | 1.557E-18 |
| 1054    | Nonribosomal peptide structures                      | 1.158E-03 | 0.000E+00   | 3.213E-17 |
| 473     | D-Alanine metabolism                                 | 2.257E-03 | 4.061E-03   | 6.060E-17 |
| 625     | Tetrachloroethene degradation                        | 5.132E-03 | 2.688E-03   | 3.402E-16 |
| 631     | 1,2-Dichloroethane degradation                       | 2.259E-03 | 6.720E-04   | 6.538E-16 |
| 630     | Glyoxylate and dicarboxylate metabolism              | 2.485E-02 | 1.949E-02   | 7.399E-16 |
| 720     | Reductive carboxylate cycle (CO2 fixation)           | 2.923E-02 | 2.346E-02   | 1.231E-15 |
| 620     | Pyruvate metabolism                                  | 5.180E-02 | 4.434E-02   | 5.271E-15 |
| 950     | Alkaloid biosynthesis I                              | 5.769E-03 | 3.274E-03   | 6.729E-15 |
| 540     | Lipopolysaccharide biosynthesis                      | 1.525E-02 | 1.127E-02   | 3.379E-14 |
| 523     | Polyketide sugar unit biosynthesis                   | 7.945E-03 | 5.105E-03   | 6.797E-14 |
| 632     | Benzoate degradation via CoA ligation                | 3.191E-02 | 2.644E-02   | 7.740E-13 |
| 562     | Inositol phosphate metabolism                        | 5.924E-03 | 3.575E-03   | 9.599E-13 |
| 650     | Butanoate metabolism                                 | 4.746E-02 | 4.085E-02   | 1.009E-12 |
| 230     | Purine metabolism                                    | 8.719E-02 | 7.848E-02   | 1.830E-12 |
| 740     | Riboflavin metabolism                                | 8.028E-03 | 1.082E-02   | 4.236E-12 |
| 130     | Ubiquinone biosynthesis                              | 3.868E-02 | 3.290E-02   | 8.390E-12 |
| 660     | C5-Branched dibasic acid metabolism                  | 9.052E-03 | 6.306E-03   | 2.963E-11 |
| 520     | Nucleotide sugars metabolism                         | 2.141E-02 | 1.720E-02   | 3.621E-11 |
| 61      | Fatty acid biosynthesis                              | 2.062E-02 | 1.657E-02   | 1.058E-10 |
| 480     | Glutathione metabolism                               | 1.167E-02 | 8.636E-03   | 1.293E-10 |
| 791     | Atrazine degradation                                 | 1.206E-03 | 2.860E-04   | 7.251E-10 |
| 271     | Methionine metabolism                                | 1.818E-02 | 1.454E-02   | 9.308E-10 |
| 770     | Pantothenate and CoA biosynthesis                    | 2.358E-02 | 1.953E-02   | 2.651E-09 |
| 450     | Selenoamino acid metabolism                          | 2.369E-02 | 1.965E-02   | 3.053E-09 |
| 240     | Pyrimidine metabolism                                | 7.160E-02 | 6.484E-02   | 7.310E-09 |
| 580     | Phospholipid degradation                             | 8.743E-04 | 1.702E-03   | 1.000E-08 |
| 220     | Urea cycle and metabolism of amino groups            | 2.238E-02 | 1.859E-02   | 1.560E-08 |
| 31      | Inositol metabolism                                  | 4.271E-03 | 2.660E-03   | 4.244E-08 |
| 62      | Fatty acid elongation in mitochondria                | 1.161E-02 | 8.965E-03   | 6.304E-08 |
| 960     | Alkaloid biosynthesis II                             | 8.721E-05 | 5.005E-04   | 9.908E-08 |
| 52      | Galactose metabolism                                 | 1.636E-02 | 1.945E-02   | 2.892E-07 |
| 312     | beta-Lactam resistance                               | 4.360E-06 | 1.716E-04   | 3.286E-07 |
| 563     | Glycosylphosphatidylinositol(GPI)-anchor biosynthesi | 4.949E-04 | 0.000E+00   | 5.856E-07 |
| 710     | Carbon fixation                                      | 2.803E-02 | 2.458E-02   | 1.803E-05 |
| 4110    | Cell cycle                                           | 2.420E-04 | 0.000E+00   | 2.345E-05 |
| 601     | Glycosphingolipid biosynthesis - lactoseries         | 6.519E-04 | 1.430E-04   | 2.730E-05 |
| 590     | Arachidonic acid metabolism                          | 6.584E-04 | 1.573E-04   | 4.886E-05 |
| 4120    | Ubiquitin mediated proteolysis                       | 2.289E-04 | 0.000E+00   | 5.496E-05 |
| 940     | Stilbene, coumarine and lignin biosynthesis          | 5.621E-03 | 4.132E-03   | 5.619E-05 |
| 471     | D-Glutamine and D-glutamate metabolism               | 3.789E-03 | 5.047E-03   | 7.600E-05 |
| 561     | Glycerolipid metabolism                              | 3.732E-02 | 4.099E-02   | 1.750E-04 |
| 430     | Taurine and hypotaurine metabolism                   | 2.871E-03 | 3.889E-03   | 4.518E-04 |
| 4210    | Apoptosis                                            | 1.940E-04 | 0.000E+00   | 5.326E-04 |
| 300     | Lysine biosynthesis                                  | 2.518E-02 | 2.803E-02   | 7.956E-04 |
