# Supplementary material
Source: PubMed Central journal article supplement (PMC1955820)
Supplement: pnas_0702636104_16.pdf [file pnas_0702636104_16.pdf]

Table 6. The 60 most frequently occurring COG neighborhoods unique to metagenomic datasets

| Occurrences | COG A   | COG B   | COG A Description                                                                      | COG B Description                                                                   |
|-------------|---------|---------|----------------------------------------------------------------------------------------|-------------------------------------------------------------------------------------|
| 171         | COG1077 | COG0119 | Actin-like ATPase involved in cell morphogenesis                                       | Isopropylmalate/homocitrate/citramalate synthases                                   |
| 161         | COG0015 | COG0024 | Adenylosuccinate lyase                                                                 | Methionine aminopeptidase                                                           |
| 153         | COG0190 | COG0762 | 5,10-methylene-tetrahydrofolate dehydrogenase/Methenyl tetrahydrofolate cyclohydrolase | Predicted integral membrane protein                                                 |
| 149         | COG0072 | COG0481 | Phenylalanyl-tRNA synthetase beta subunit                                              | Membrane GTPase LepA                                                                |
| 144         | COG0527 | COG0821 | Aspartokinases                                                                         | Enzyme involved in the deoxyxylulose pathway of isoprenoid biosynthesis             |
| 143         | COG2086 | COG0404 | Electron transfer flavoprotein, beta subunit                                           | Glycine cleavage system T protein (aminomethyltransferase)                          |
| 141         | COG0141 | COG0361 | Histidinol dehydrogenase                                                               | Translation initiation factor 1 (IF-1)                                              |
| 139         | COG0008 | COG1974 | Glutamyl- and glutaminyl-tRNA synthetases                                              | SOS-response transcriptional repressors (RecA-mediated autopeptidases)              |
| 134         | COG0289 | COG0177 | Dihydrodipicolinate reductase                                                          | Predicted EndoIII-related endonuclease                                              |
| 133         | COG0192 | COG0815 | S-adenosylmethionine synthetase                                                        | Apolipoprotein N-acyltransferase                                                    |
| 129         | COG0119 | COG0215 | Isopropylmalate/homocitrate/citramalate                                                | CysteinyI-tRNA synthetase                                                           |
| 128         | COG0524 | COG0177 | Sugar kinases, ribokinase family                                                       | Predicted EndoIII-related endonuclease                                              |
| 126         | COG0483 | COG0254 | Archaeal fructose-1,6-bisphosphatase and related enzymes of inositol monophosphatase   | Ribosomal protein L31                                                               |
| 124         | COG0188 | COG0629 | Type IIA topoisomerase (DNA gyrase/topo II, topoisomerase IV), A subunit               | Single-stranded DNA-binding protein                                                 |
| 123         | COG0254 | COG3820 | Ribosomal protein L31                                                                  | Uncharacterized protein conserved in bacteria                                       |
| 123         | COG0192 | COG0195 | S-adenosylmethionine synthetase                                                        | Transcription elongation factor                                                     |
| 122         | COG0477 | COG0168 | Permeases of the major facilitator superfamily                                         | Trk-type K+ transport systems, membrane components                                  |
| 121         | COG0349 | COG0794 | Ribonuclease D                                                                         | Predicted sugar phosphate isomerase involved in capsule formation                   |
| 121         | COG0206 | COG2001 | Cell division GTPase                                                                   | Uncharacterized protein conserved in bacteria                                       |
| 120         | COG1304 | COG1304 | L-lactate dehydrogenase (FMN-dependent) and related alpha-hydroxy acid dUTPase         | L-lactate dehydrogenase (FMN-dependent) and related alpha-hydroxy acid              |
| 120         | COG0756 | COG0476 | dUTPase                                                                                | Dinucleotide-utilizing enzymes involved in molybdopterin and thiamine biosynthesis  |
| 119         | COG0167 | COG1384 | Dihydroorotate dehydrogenase                                                           | Lysyl-tRNA synthetase (class I)                                                     |
| 117         | COG0668 | COG0762 | Small-conductance mechanosensitive channel                                             | Predicted integral membrane protein                                                 |
| 117         | COG0499 | COG0802 | S-adenosylhomocysteine hydrolase                                                       | Predicted ATPase or kinase                                                          |
| 116         | COG0604 | COG1741 | NADPH:quinone reductase and related Zn-dependent oxidoreductases                       | Pirip-related protein                                                               |
| 115         | COG0462 | COG1496 | Phosphoribosylpyrophosphate synthetase                                                 | Uncharacterized conserved protein                                                   |
| 115         | COG0408 | COG0782 | Coproporphyrinogen III oxidase                                                         | Transcription elongation factor                                                     |
| 114         | COG0400 | COG1403 | Predicted esterase                                                                     | Restriction endonuclease                                                            |
| 114         | COG0104 | COG0351 | Adenylosuccinate synthase                                                              | Hydroxymethylpyrimidine/phosphomethylpyrimidine kinase                              |
| 113         | COG0180 | COG0694 | Tryptophanyl-tRNA synthetase                                                           | Thioredoxin-like proteins and domains                                               |
| 112         | COG0225 | COG2897 | Peptide methionine sulfoxide reductase                                                 | Rhodanese-related sulfurtransferase                                                 |
| 112         | COG0408 | COG0219 | Coproporphyrinogen III oxidase                                                         | Predicted rRNA methylase (SpoU class)                                               |
| 112         | COG2009 | COG0136 | Succinate dehydrogenase/fumarate reductase, cytochrome b subunit                       | Aspartate-semialdehyde dehydrogenase                                                |
| 109         | COG0119 | COG0565 | Isopropylmalate/homocitrate/citramalate synthases                                      | rRNA methylase                                                                      |
| 108         | COG0793 | COG0799 | Periplasmic protease                                                                   | Uncharacterized homolog of plant lojap                                              |
| 108         | COG0717 | COG0766 | Deoxycytidine deaminase                                                                | UDP-N-acetylglucosamine enolpyruvyl                                                 |
| 107         | COG1304 | COG0436 | L-lactate dehydrogenase (FMN-dependent) and related alpha-hydroxy acid                 | Aspartate/tyrosine/aromatic aminotransferase                                        |
| 105         | COG0343 | COG0652 | Queuine/archaeosine tRNA-ribosyltransferase                                            | Peptidyl-prolyl cis-trans isomerase (rotamase) : cyclophilin family                 |
| 104         | COG0289 | COG0484 | Dihydrodipicolinate reductase                                                          | DnaJ-class molecular chaperone with C-terminal Zn finger domain                     |
| 102         | COG0492 | COG0625 | Thioredoxin reductase                                                                  | Glutathione S-transferase                                                           |
| 101         | COG0686 | COG0161 | Alanine dehydrogenase                                                                  | Adenosylmethionine-8-amino-7-oxononanoate aminotransferase                          |
| 101         | COG0006 | COG3473 | Xaa-Pro aminopeptidase                                                                 | Maleate cis-trans isomerase                                                         |
| 100         | COG621  | COG0735 | 2-methylthioadenine synthetase                                                         | Fe2+/Zn2+ uptake regulation proteins                                                |
| 100         | COG1109 | COG0351 | Phosphomannomutase                                                                     | Hydroxymethylpyrimidine/phosphomethylpyrimidine kinase                              |
| 98          | COG0461 | COG0854 | Orotate phosphoribosyltransferase                                                      | Pyridoxal phosphate biosynthesis protein                                            |
| 97          | COG0821 | COG0216 | Enzyme involved in the deoxyxylulose pathway of isoprenoid biosynthesis                | Protein chain release factor A                                                      |
| 96          | COG0077 | COG2812 | Prephenate dehydratase                                                                 | DNA polymerase III, gamma/tau subunits                                              |
| 95          | COG0548 | COG0706 | Acetylglutamate kinase                                                                 | Preprotein translocase subunit YidC                                                 |
| 95          | COG0479 | COG1012 | Succinate dehydrogenase/fumarate reductase, Fe-S protein subunit                       | NAD-dependent aldehyde dehydrogenases                                               |
| 94          | COG1028 | COG0861 | Dehydrogenases with different specificities (related to short-chain alcohol)           | Membrane protein TerC, possibly involved in tellurium resistance                    |
| 94          | COG0284 | COG0776 | Orotidine-5-phosphate decarboxylase                                                    | Bacterial nucleoid DNA-binding protein                                              |
| 94          | COG0134 | COG1974 | Indole-3-glycerol phosphate synthase                                                   | SOS-response transcriptional repressors (RecA-mediated autopeptidases)              |
| 93          | COG0129 | COG0525 | Dihydroxyacid dehydratase/phosphogluconate dehydratase                                 | Valyl-tRNA synthetase                                                               |
| 92          | COG0324 | COG0265 | tRNA delta(2)-isopentenylpyrophosphate transferase                                     | Trypsin-like serine proteases, typically periplasmic, contain C-terminal PDZ domain |
| 91          | COG0604 | COG0302 | NADPH:quinone reductase and related Zn-dependent oxidoreductases                       | GTP cyclohydrolase I                                                                |
| 91          | COG0128 | COG1137 | 5-enolpyruvylshikimate-3-phosphate synthase                                            | ABC-type (unclassified) transport system, ATPase component                          |
| 91          | COG0006 | COG0210 | Xaa-Pro aminopeptidase                                                                 | Superfamily I DNA and RNA helicases                                                 |
| 89          | COG1003 | COG2907 | Glycine cleavage system protein P (pyridoxal-binding), C-terminal domain               | Predicted NAD/FAD-binding protein                                                   |
| 89          | COG2303 | COG0861 | Choline dehydrogenase and related flavoproteins                                        | Membrane protein TerC, possibly involved in tellurium resistance                    |
| 88          | COG0382 | COG1132 | 4-hydroxybenzoate polyprenyltransferase and related prenyltransferases                 | ABC-type multidrug transport system, ATPase and permease components                 |
