# Supplementary material
Source: PubMed Central journal article supplement (PMC1955820)
Supplement: pnas_0702636104_17.pdf [file pnas_0702636104_17.pdf]

Table 7. The 124 prokaryotic species from the STRING database used in this analysis

| NCBI Taxid | Species Name                            | NCBI Taxid | Species Name                            |
|------------|-----------------------------------------|------------|-----------------------------------------|
| 56636      | <i>Aeropyrum pernix</i>                 | 2104       | <i>Mycoplasma pneumoniae</i>            |
| 181661     | <i>Agrobacterium tumefaciens</i> Cereon | 2107       | <i>Mycoplasma pulmonis</i>              |
| 180835     | <i>Agrobacterium tumefaciens</i> WashU  | 160232     | <i>Nanoarchaeum equitans</i>            |
| 63363      | <i>Aquifex aeolicus</i>                 | 65699      | <i>Neisseria meningitidis</i> A         |
| 2234       | <i>Archaeoglobus fulgidus</i>           | 491        | <i>Neisseria meningitidis</i> B         |
| 198094     | <i>Bacillus anthracis</i>               | 103690     | <i>Nostoc</i> sp. PCC 7120              |
| 222523     | <i>Bacillus cereus</i> ATCC 10987       | 182710     | <i>Oceanobacillus iheyensis</i>         |
| 86665      | <i>Bacillus halodurans</i>              | 747        | <i>Pasteurella multocida</i>            |
| 1423       | <i>Bacillus subtilis</i>                | 100379     | <i>Phytoplasma</i> Onion yellows        |
| 959        | <i>Bdellovibrio bacteriovorus</i>       | 59919      | CCMP1378                                |
| 203907     | <i>Blochmannia floridanus</i>           | 1219       | <i>Prochlorococcus marinus</i> SS120    |
| 139        | <i>Borrelia burgdorferi</i>             | 13773      | <i>Pyrobaculum aerophilum</i>           |
| 375        | <i>Bradyrhizobium japonicum</i>         | 29292      | <i>Pyrococcus abyssi</i>                |
| 29459      | <i>Brucella melitensis</i>              | 2261       | <i>Pyrococcus furiosus</i>              |
| 118099     | <i>Buchnera aphidicola</i> APS          | 53953      | <i>Pyrococcus horikoshii</i>            |
| 135842     | <i>Buchnera aphidicola</i> Bp           | 305        | <i>Ralstonia solanacearum</i>           |
| 98794      | <i>Buchnera aphidicola</i> Sg           | 381        | <i>Rhizobium loti</i>                   |
| 197        | <i>Campylobacter jejuni</i>             | 382        | <i>Rhizobium meliloti</i>               |
| 155892     | <i>Caulobacter crescentus</i>           | 1076       | <i>Rhodopseudomonas palustris</i>       |
| 83560      | <i>Chlamydia muridarum</i>              | 781        | <i>Rickettsia conorii</i>               |
| 115711     | <i>Chlamydia pneumoniae</i> AR39        | 782        | <i>Rickettsia prowazekii</i>            |
| 115713     | <i>Chlamydia pneumoniae</i> CWL029      | 601        | <i>Salmonella typhi</i>                 |
| 813        | <i>Chlamydia trachomatis</i>            | 602        | <i>Salmonella typhimurium</i>           |
| 83557      | <i>Chlamydomphila caviae</i>            | 70863      | <i>Shewanella oneidensis</i>            |
| 182082     | <i>Chlamydomphila pneumoniae</i> TW183  | 623        | <i>Shigella flexneri</i> 2a 301         |
| 1097       | <i>Chlorobium tepidum</i>               | 196620     | <i>Staphylococcus aureus</i> MW2        |
| 1488       | <i>Clostridium acetobutylicum</i>       | 158879     | <i>Staphylococcus aureus</i> N315       |
| 1502       | <i>Clostridium perfringens</i>          | 1282       | <i>Staphylococcus epidermidis</i>       |
| 1513       | <i>Clostridium tetani</i>               | 216495     | <i>Streptococcus agalactiae</i> III     |
| 1717       | <i>Corynebacterium diphtheriae</i>      | 216466     | <i>Streptococcus agalactiae</i> V       |
| 1718       | <i>Corynebacterium glutamicum</i>       | 1309       | <i>Streptococcus mutans</i>             |
| 196627     | <i>Corynebacterium glutamicum</i> 13032 | 171101     | <i>Streptococcus pneumoniae</i> R6      |
| 1299       | <i>Deinococcus radiodurans</i>          | 1313       | <i>Streptococcus pneumoniae</i> TIGR4   |
| 882        | <i>Desulfovibrio vulgaris</i>           | 1314       | <i>Streptococcus pyogenes</i> M1        |
| 155864     | <i>Escherichia coli</i> EDL933          | 198466     | <i>Streptococcus pyogenes</i> MGAS315   |
| 562        | <i>Escherichia coli</i> K12             | 186103     | <i>Streptococcus pyogenes</i> MGAS8232  |
| 83334      | <i>Escherichia coli</i> O157:H7         | 193567     | <i>Streptococcus pyogenes</i> SSI-1     |
| 217992     | <i>Escherichia coli</i> O6              | 1902       | <i>Streptomyces coelicolor</i>          |
| 76856      | <i>Fusobacterium nucleatum</i>          | 2287       | <i>Sulfolobus solfataricus</i>          |
| 35554      | <i>Geobacter sulfurreducens</i>         | 111955     | <i>Sulfolobus tokodaii</i>              |
| 33072      | <i>Gloeobacter violaceus</i>            | 32046      | <i>Synechococcus elongatus</i>          |
| 727        | <i>Haemophilus influenzae</i>           | 84588      | <i>Synechococcus</i> sp. WH8102         |
| 210        | <i>Helicobacter pylori</i> 26695        | 1148       | <i>Synechocystis</i> sp. PCC6803        |
| 85963      | <i>Helicobacter pylori</i> J99          | 119072     | <i>Thermoanaerobacter tengcongensis</i> |
| 33959      | <i>Lactobacillus johnsonii</i>          | 2303       | <i>Thermoplasma acidophilum</i>         |
| 1590       | <i>Lactobacillus plantarum</i>          | 50339      | <i>Thermoplasma volcanium</i>           |
| 1360       | <i>Lactococcus lactis</i>               | 2336       | <i>Thermotoga maritima</i>              |
| 44275      | <i>Leptospira interrogans</i> L1-130    | 262724     | <i>Thermus thermophilus</i>             |
| 1642       | <i>Listeria innocua</i>                 | 158        | <i>Treponema denticola</i>              |
| 1639       | <i>Listeria monocytogenes</i> EGD       | 160        | <i>Treponema pallidum</i>               |
| 2190       | <i>Methanococcus jannaschii</i>         | 134821     | <i>Ureaplasma parvum</i>                |
| 39152      | <i>Methanococcus maripaludis</i>        | 666        | <i>Vibrio cholerae</i>                  |
| 2320       | <i>Methanopyrus kandleri</i>            | 670        | <i>Vibrio parahaemolyticus</i>          |
| 2214       | <i>Methanosarcina acetivorans</i>       | 196600     | <i>Vibrio vulnificus</i> YJ016          |
| 1765       | <i>Mycobacterium avium</i>              | 36870      | <i>Wigglesworthia bripalpis</i>         |
| 1769       | <i>Mycobacterium leprae</i>             | 66077      | <i>Wolbachia</i> sp. wMel               |
| 1770       | <i>Mycobacterium paratuberculosis</i>   | 92829      | <i>Xanthomonas axonopodis</i>           |
| 83331      | CDC1551                                 | 340        | <i>Xanthomonas campestris</i>           |
| 2096       | <i>Mycoplasma gallisepticum</i>         | 2371       | <i>Xylella fastidiosa</i> 9a5c          |
| 2097       | <i>Mycoplasma genitalium</i>            | 632        | <i>Yersinia pestis</i> CO92             |
| 44101      | <i>Mycoplasma mycoides</i>              | 187410     | <i>Yersinia pestis</i> KIM              |
| 28227      | <i>Mycoplasma penetrans</i>             | 229193     | <i>Yersinia pestis</i> Medievalis       |
