# Supplementary material
Source: PubMed Central journal article supplement (PMC1955820)
Supplement: pnas_0702636104_18.pdf [file pnas_0702636104_18.pdf]

Table 8. Data in Figure 4

| Bin                  | Mean<br>Fam. Size | Fn. Characterized |           | Fn. Uncharacterized |           | Total<br>in Bin |
|----------------------|-------------------|-------------------|-----------|---------------------|-----------|-----------------|
|                      |                   | #                 | % of bin  | #                   | % of bin  |                 |
| 1                    | 517.36            | 1,909             | 95        | 91                  | 5         | 2,000           |
| 2                    | 47.96             | 1,665             | 83        | 335                 | 17        | 2,000           |
| 3                    | 18.88             | 1,523             | 76        | 477                 | 24        | 2,000           |
| 4                    | 10.9              | 1,431             | 72        | 569                 | 28        | 2,000           |
| 5                    | 7.1               | 1,299             | 65        | 701                 | 35        | 2,000           |
| 6                    | 5.28              | 1,363             | 68        | 637                 | 32        | 2,000           |
| 7                    | 4.05              | 1,281             | 64        | 719                 | 36        | 2,000           |
| 8                    | 3.26              | 1,188             | 59        | 812                 | 41        | 2,000           |
| 9                    | 3                 | 1,148             | 57        | 852                 | 43        | 2,000           |
| 10                   | 2.51              | 1,043             | 52        | 957                 | 48        | 2,000           |
| 11                   | 2                 | 899               | 45        | 1,101               | 55        | 2,000           |
| 12                   | 2                 | 884               | 44        | 1,116               | 56        | 2,000           |
| 13                   | 2                 | 900               | 45        | 1,100               | 55        | 2,000           |
| 14                   | 2                 | 927               | 46        | 1,073               | 54        | 2,000           |
| 15                   | 2                 | 914               | 46        | 1,086               | 54        | 2,000           |
| 16                   | 2                 | 903               | 45        | 1,097               | 55        | 2,000           |
| 17                   | 1.05              | 568               | 28        | 1,432               | 72        | 2,000           |
| Sample singleton bin |                   | 533               | 27        | 1,467               | 73        | 2,000           |
| All singletons       |                   | 47,394            | 27        | 126,730             | 73        | 174,124         |
| <b>Total</b>         |                   | <b>66,715</b>     | <b>32</b> | <b>139,502</b>      | <b>68</b> | <b>206,217</b>  |
