# Supplementary material
Source: PubMed Central journal article supplement (PMC1955820)

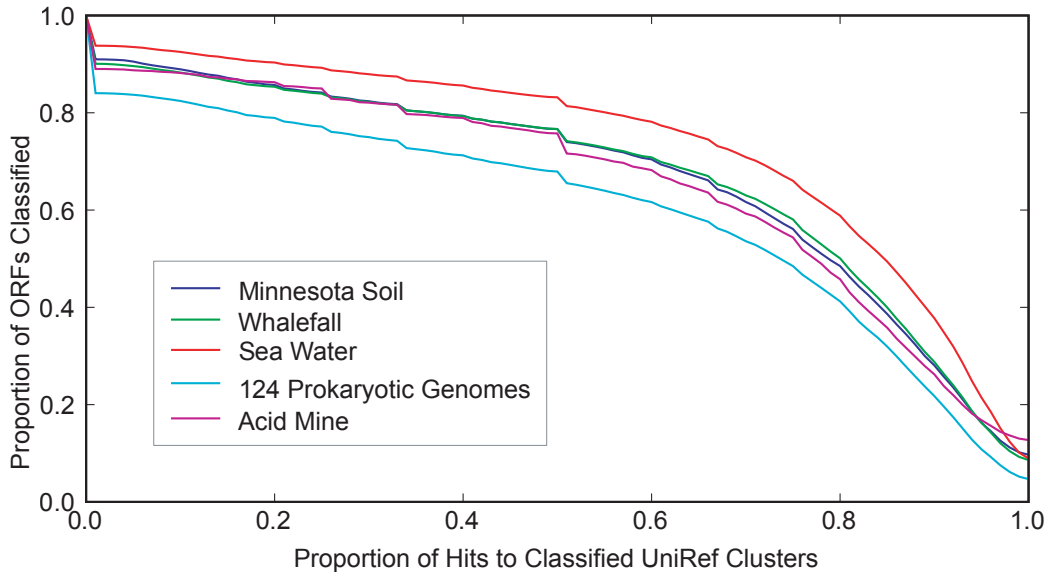

Supplement: pnas_0702636104_1.pdf [file pnas_0702636104_1.pdf]

**40 Bit Cutoff****60 Bit Cutoff****80 Bit Cutoff****Surface Sea Water**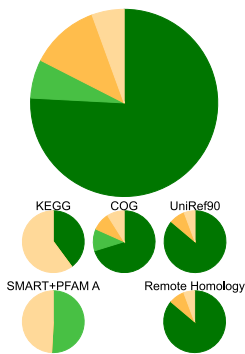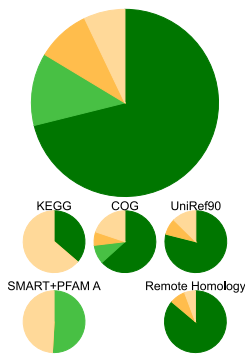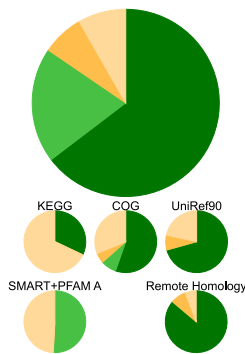**Minnesota Soil**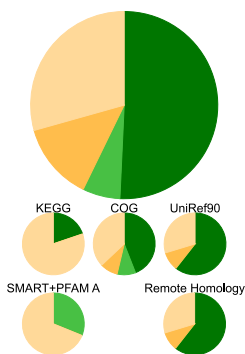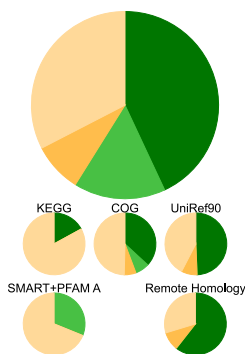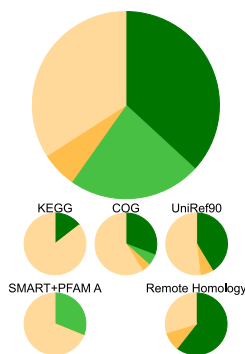**Whale Fall**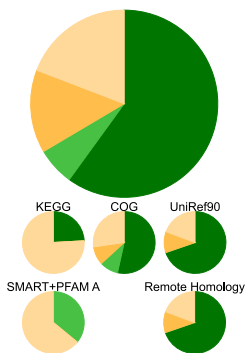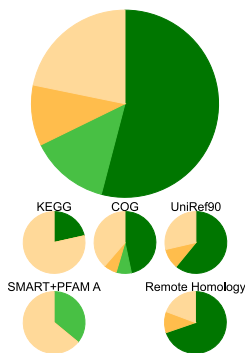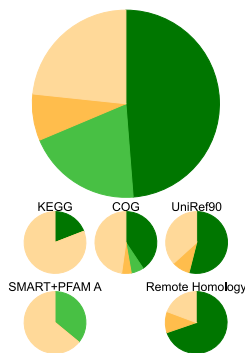**Acid Mine**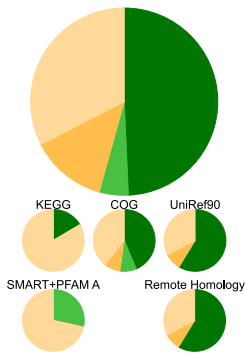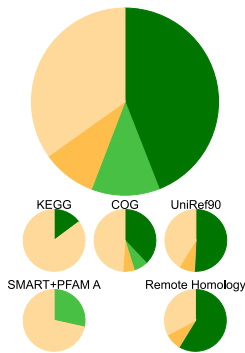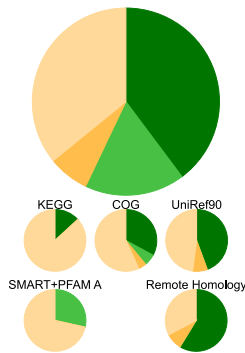

Supplement: pnas_0702636104_2.pdf [file pnas_0702636104_2.pdf]

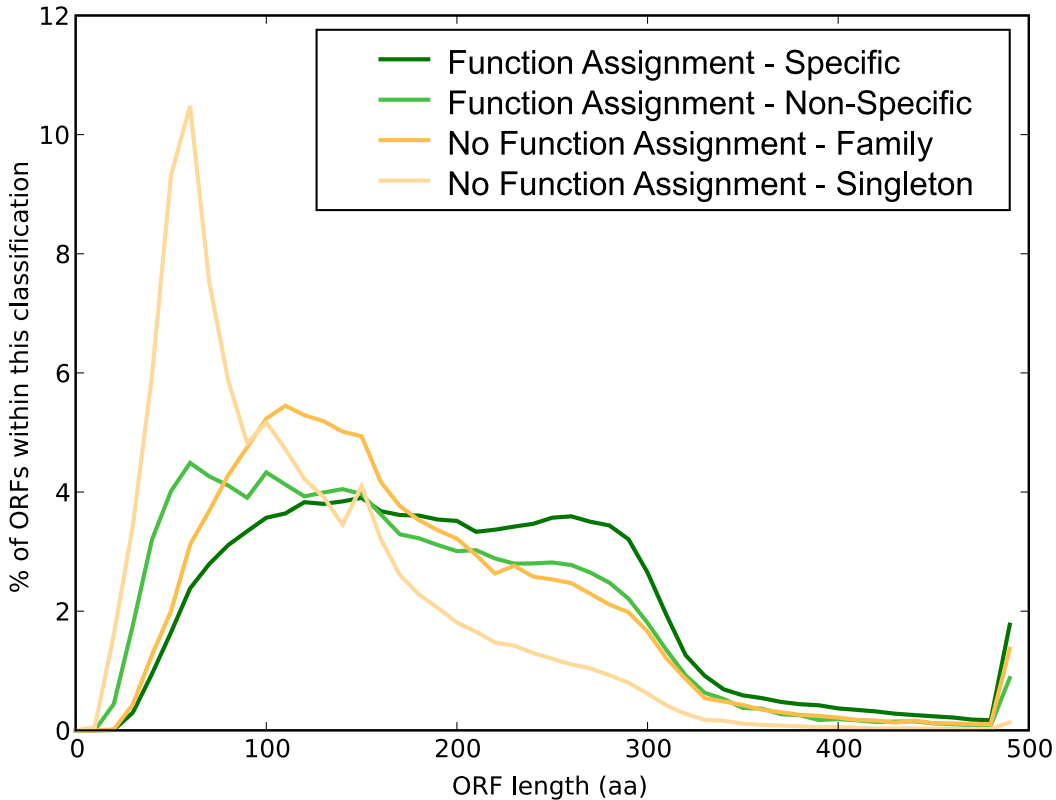

Supplement: pnas_0702636104_3.pdf [file pnas_0702636104_3.pdf]

# Surface Sea Water

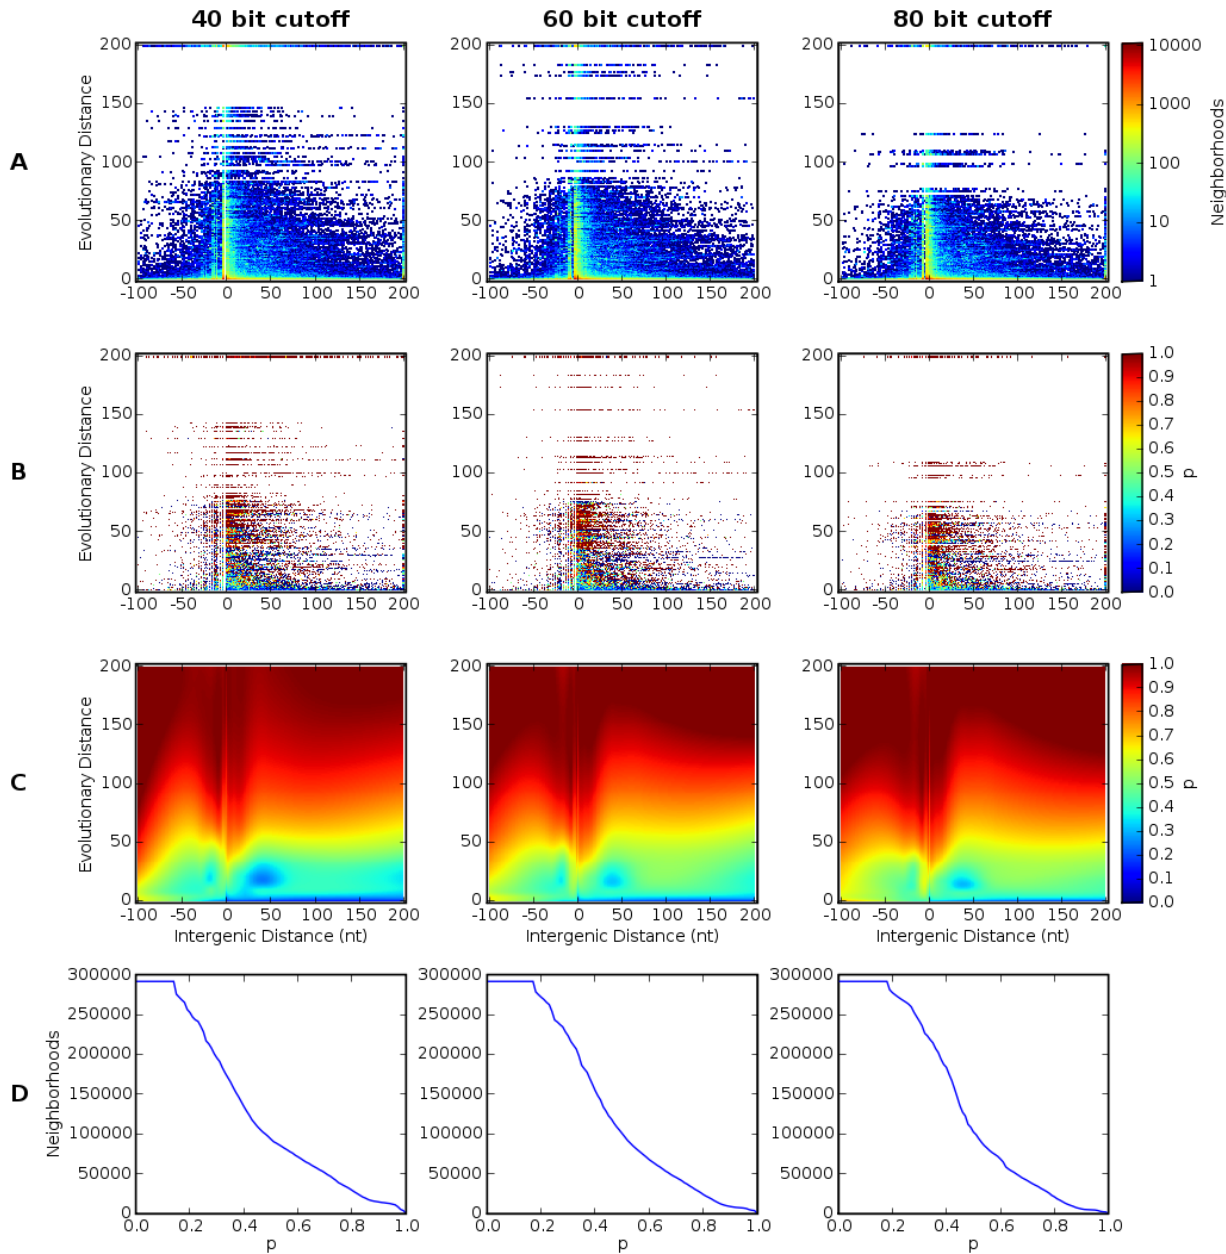

Supplement: pnas_0702636104_4.pdf [file pnas_0702636104_4.pdf]

# Minnesota Soil

## 40 bit cutoff

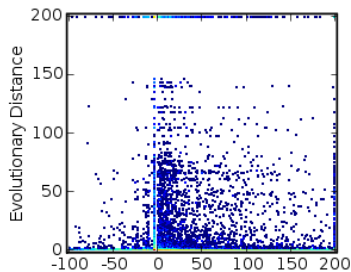

## 60 bit cutoff

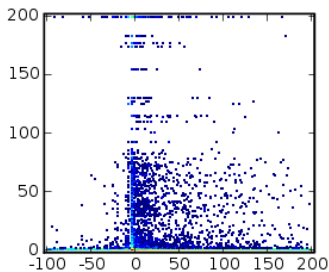

## 80 bit cutoff

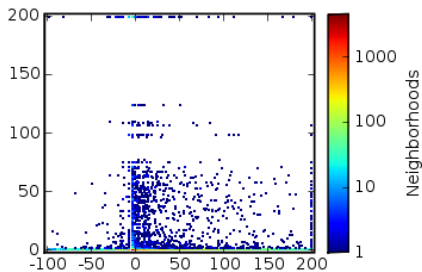

Neighbors

1000  
100  
10  
1

**A**

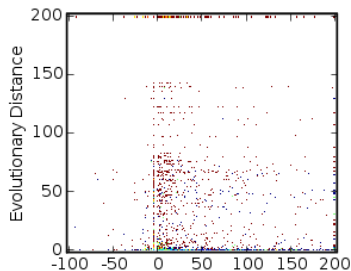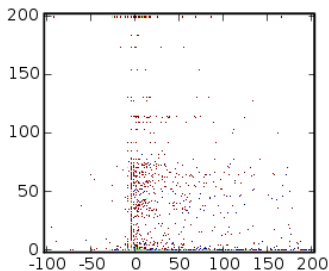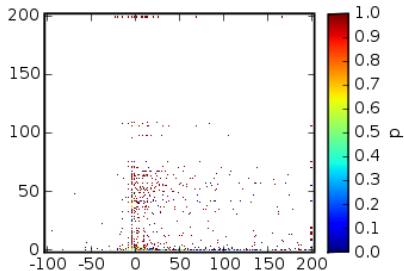

$\rho$

1.0  
0.9  
0.8  
0.7  
0.6  
0.5  
0.4  
0.3  
0.2  
0.1  
0.0

**B**

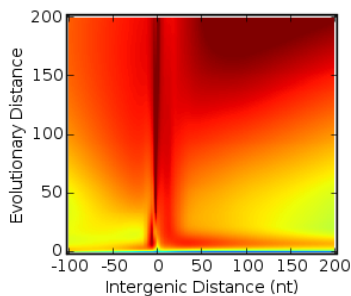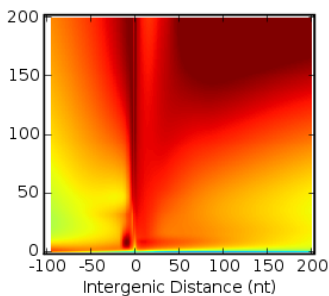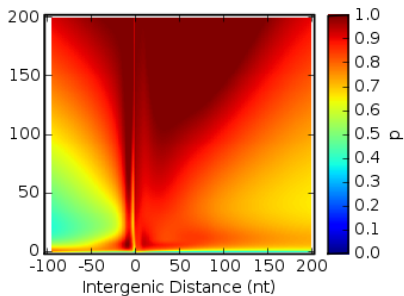

$\rho$

1.0  
0.9  
0.8  
0.7  
0.6  
0.5  
0.4  
0.3  
0.2  
0.1  
0.0

**C**

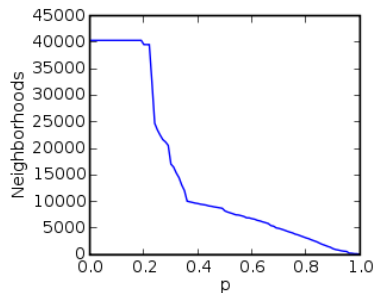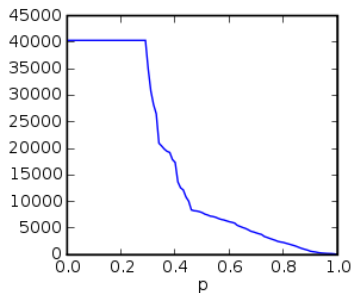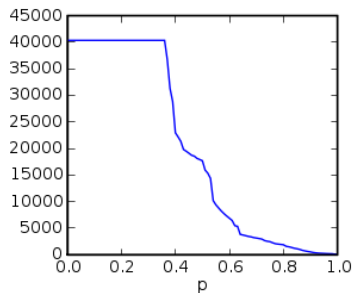

**D**

Neighbors

$\rho$

$\rho$

$\rho$

Supplement: pnas_0702636104_5.pdf [file pnas_0702636104_5.pdf]

# Whale Fall

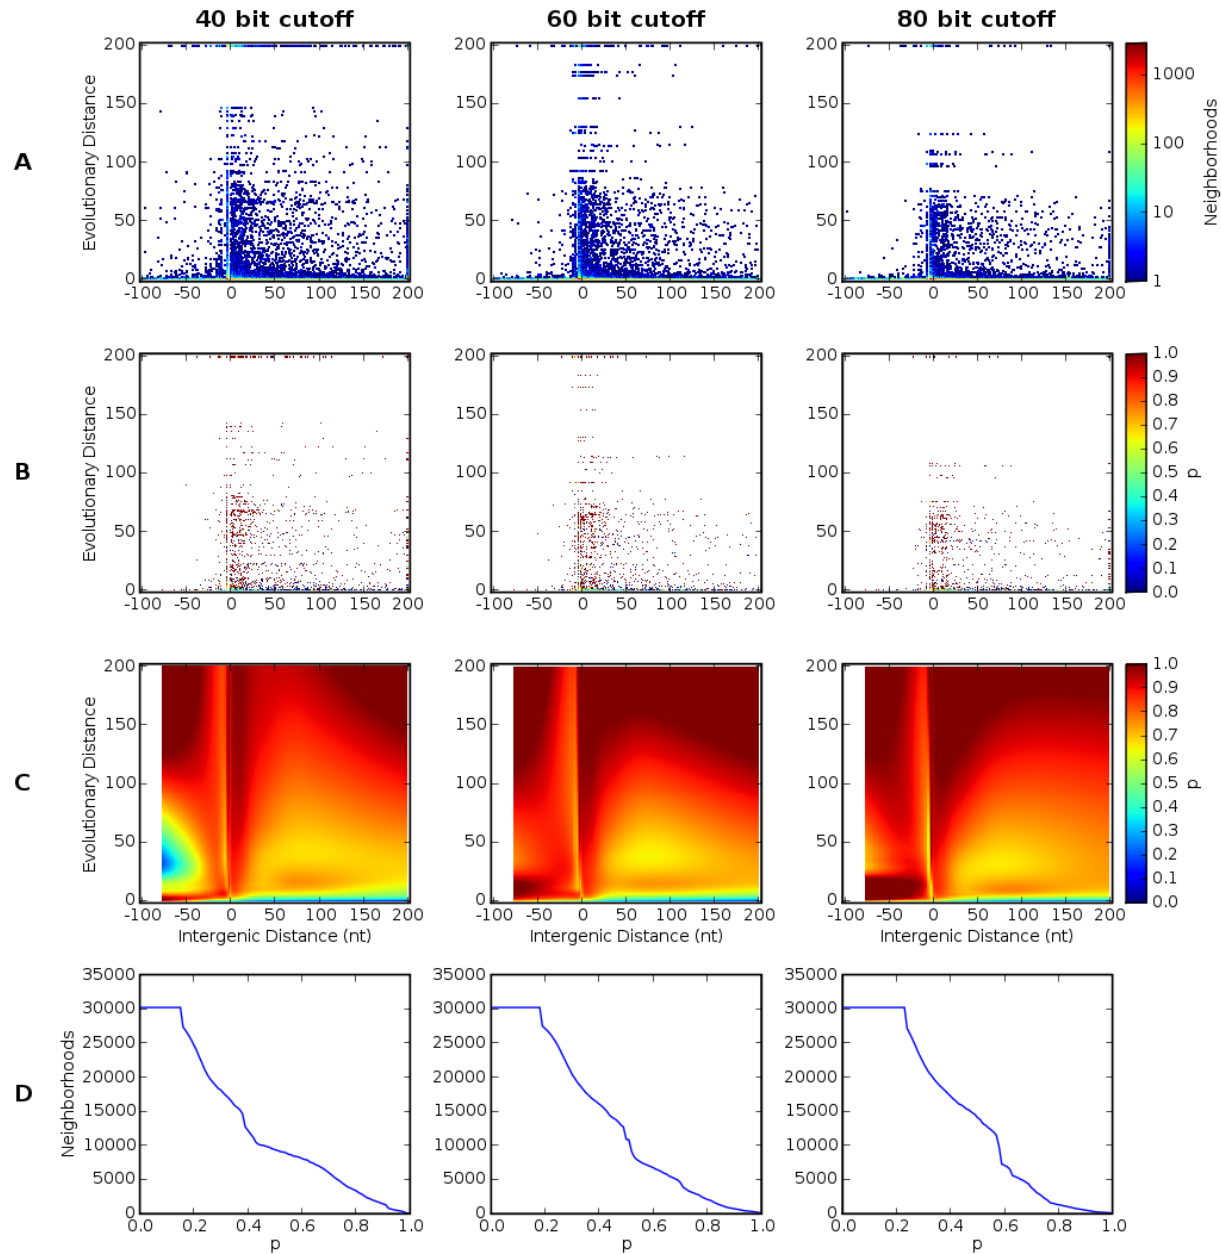

Supplement: pnas_0702636104_6.pdf [file pnas_0702636104_6.pdf]

# Acid Mine

## 40 bit cutoff

## 60 bit cutoff

## 80 bit cutoff

**A**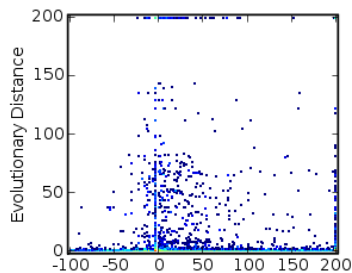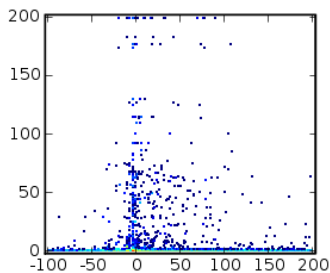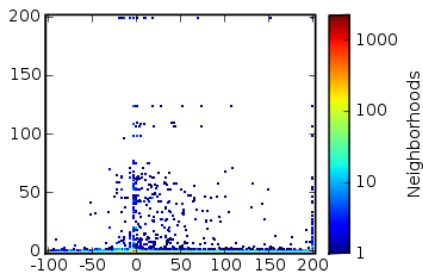**B**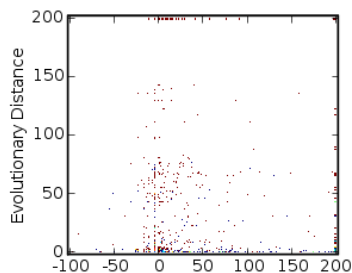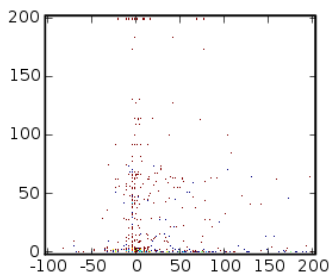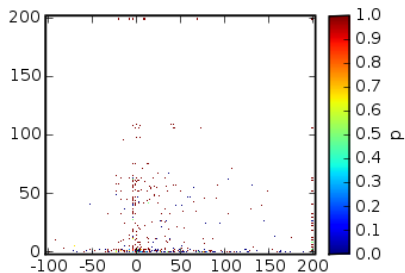**C**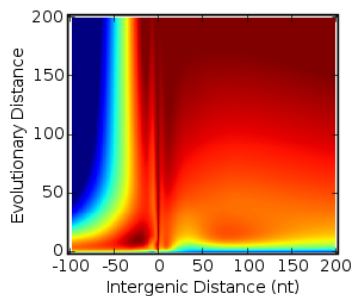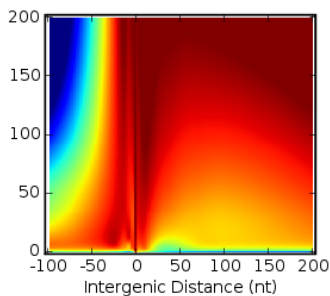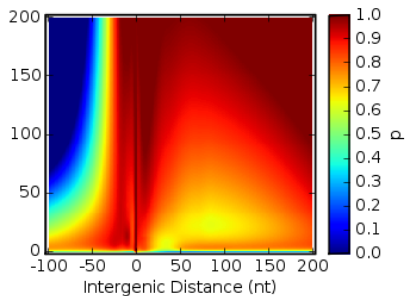**D**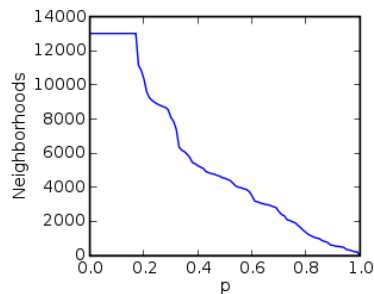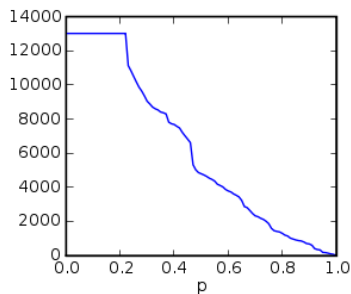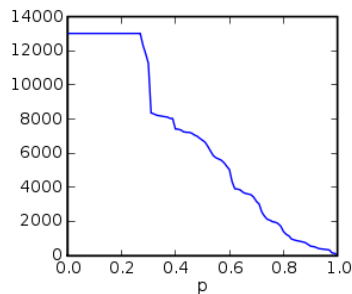

Supplement: pnas_0702636104_7.pdf [file pnas_0702636104_7.pdf]

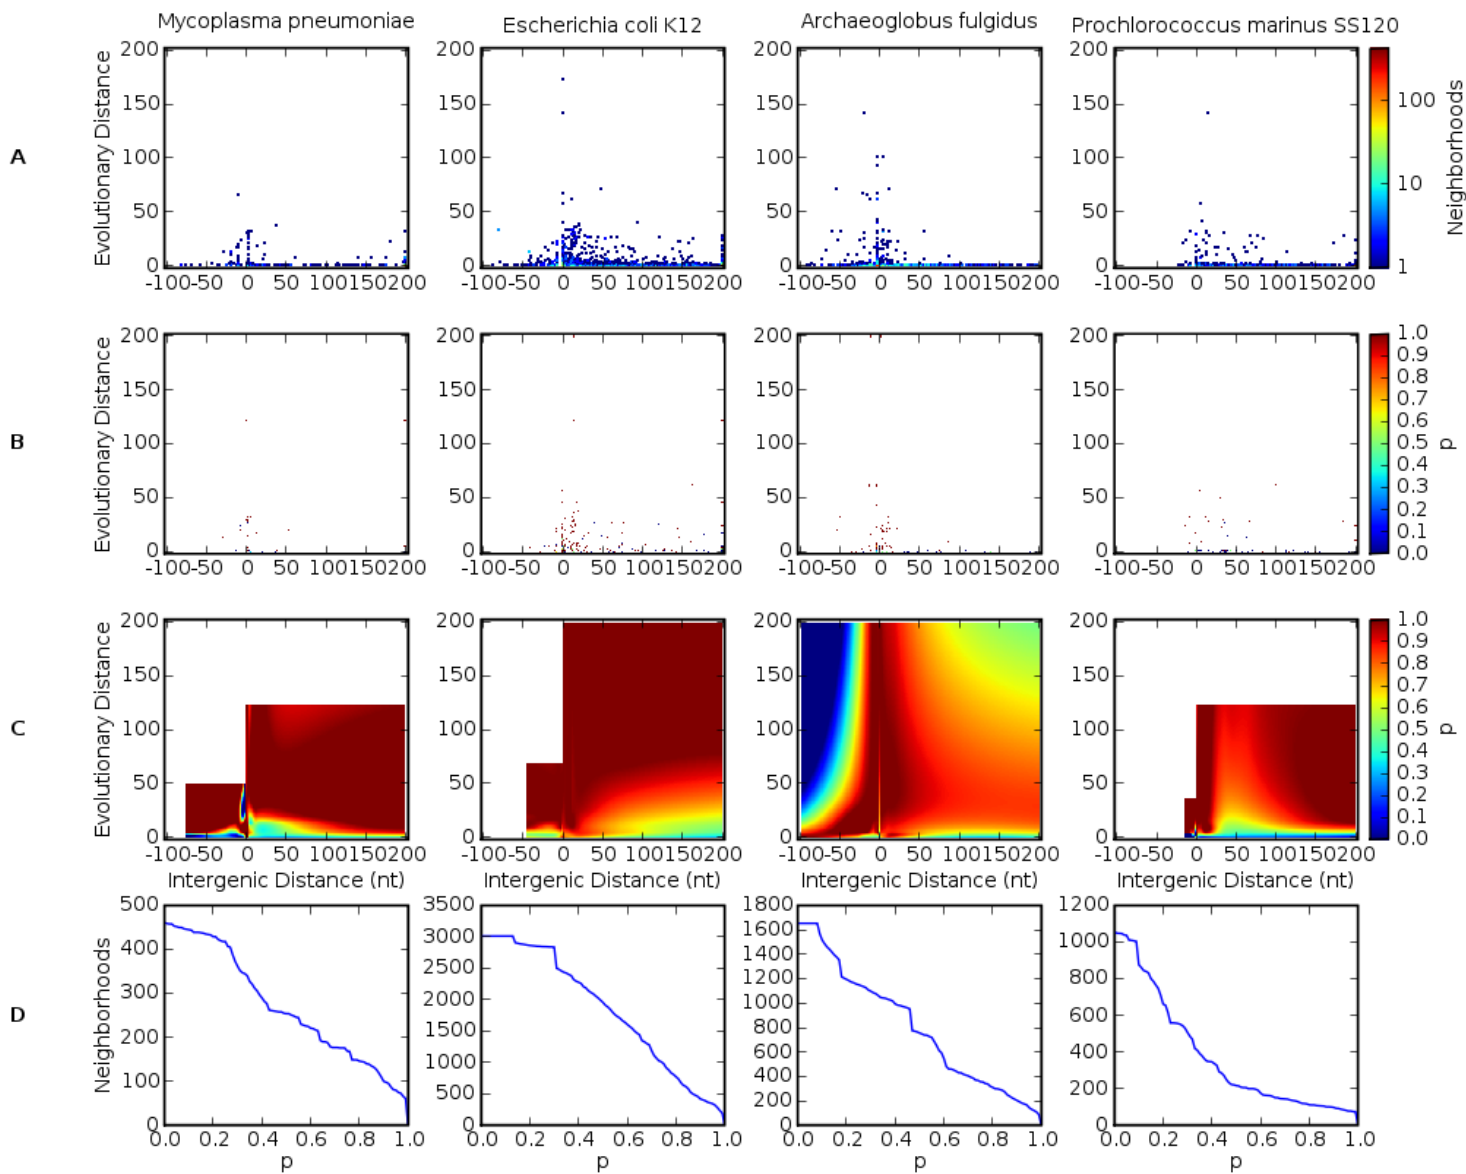

Supplement: pnas_0702636104_9.pdf [file pnas_0702636104_9.pdf]
